# Supplementary material for: Is higher-level trauma center care associated with better outcomes in patients injured by low-energy trauma?
Source: medRxiv preprint, doi:10.1101/2021.06.01.21258178, version 1 (2021-06-04)
Supplement: Supplemental Table 2 [file 258178_file05.docx]

# Appendix 2: Studies Excluded at Full Paper Stage

| **Table S2.1: Studies excluded at global quality assessment** | | | | |
| --- | --- | --- | --- | --- |
| Study | Does this study compare outcomes at a major trauma centre and a non-trauma centre? | Does this study report outcomes in patients with low-energy trauma? | Decision | Justification |
| Ahmed  2019b  [(28)](https://www.zotero.org/google-docs/?kNnrVD) | Yes | Yes | Exclude | This study cohort comprises all the 40,800 patients in Ahmed 2019 [(30)](https://www.zotero.org/google-docs/?ykQOqM). Whilst outcomes at different levels of trauma centre are reported, the aim of the paper is to produce a risk-stratification model. The findings are better described in the included paper. |
| Ahmed  2019c  [(29)](https://www.zotero.org/google-docs/?RE2PC0) | Yes | Yes | Exclude | This study is a cohort of 15,256 patients with thoracic injuries drawn from the same cohort as Ahmed 2019 [(30)](https://www.zotero.org/google-docs/?2qaoL6). After propensity matching the authors found no mortality difference between patients treated at ACS-verified level 1 & 2 cantres compared to ACS-verified level 3 & 4 centres (mortality 4.4% vs 3.9%, p = 0.14). |
| Scheetz  2015  [(31)](https://www.zotero.org/google-docs/?avehNM) | Yes | Yes | Exclude | This retrospective cohort identified 3,331 patients with traumatic brain injury following same-level falls using a New York State healthcare database. Among other goals, it aimed to identify predictors of short term mortality. The presented logistic regression model of mortality reported an OR for mortality of 1.49 for trauma centre admission (95% CI 1.17-1.89).  The review was excluded for the following reasons:  - Patients with missing trauma centre status were removed from the analysis.The number removed is not reported.  - Interfacility transfer patients were counted only upon discharge from the initial hospital, introducing significant risk of tertiary referral bias.  - The variables in the logistic regression model in text and table are discrepant.  - The referent standard used for comparison of traumatic brain injury severity was a composite of ‘unclassified’ injuries. |

# Appendix 3: Multiple Logistic Regression Models

| **Table S4.1: Multiple regression model from Ahmed 2019** | | | |
| --- | --- | --- | --- |
| Calibration and discrimination | NR* | | |
| Variable | Odds Ratio | 95% CI | P |
| Age | NR* | NR* | NR* |
| Sex |
| Race/ethnicity |
| Systolic blood pressure |
| Heart rate |
| Respiratory rate |
| Injury severity score |
| *Author contacted but information not available | | | |

| **Table S4.2: Multiple regression model from Cook 2012** | | | |
| --- | --- | --- | --- |
| Calibration and discrimination | AUROC 0.85, Hosmer-Lemeshow chi-square 4.98, p = 0.89 | | |
| Variable | Odds Ratio | 95% CI | P |
| Hypotension | 8.91 | 6.09-13.05 | <0.001 |
| Metabolic acidosis | 7.19 | 2.36-21.88 | 0.001 |
| Comorbid cancer | 3.83 | 1.57-9.35 | 0.003 |
| Comorbid renal disorder | 3.25 | 1.30-8.13 | 0.01 |
| Comorbid cardiac valve disorder | 2.53 | 1.04_6.15 | 0.04 |
| Comorbid congestive heart failure | 2.45 | 1.58-3.79 | <0.001 |
| Comorbid cardiac arrhythmia | 2.24 | 1.32-3.80 | 0.003 |
| Isolated traumatic brain injury | 2.24 | 1.13_4.43 | 0.02 |
| Any traumatic brain injury | 1.95 | 1.43-2.66 | <0.001 |
| Male gender | 1.74 | 1.17-2.58 | 0.006 |
| Trauma Mortality Prediction Model score | 1.58 | 1.27-1.95 | <0.001 |
| Age | 1 .04 | 1.02-1.05 | <0.001 |
| Glasgow Coma Scale score | 0.76 | 0.71-0.82 | <0.001 |

| **Table S4.3: Multiple regression model from Roubik 2017** | | | |
| --- | --- | --- | --- |
| Calibration and discrimination | AUROC 0.90 | | |
| Variable | Odds Ratio | 95% CI | P |
| Do not Resuscitate (DNR) status | 3.82 | (3.66-3.98) | <0.001 |
| Disseminated cancer | 2.9 | (2.71-3.11) |
| Ascites within 30 days/cirrhosis | 2.89 | (2.59-3.23) |
| Chemotherapy for cancer | 2.11 | (1.72-2.57) |
| Currently requiring dialysis | 1.79 | (1.67-1.92) |
| Congestive heart failure | 1.63 | (1.58-1.69) |
| Chronic respiratory disease | 1.4 | (1.33-1.46) |
| Bleeding disorder | 1.24 | (1.20-1.28) |
| Hypertension requiring medication | 0.86 | (0.84-0.88) |
| Cervical spine fracture | 1.43 | (1.36-1.49) |
| Thoracic spine fracture | 1.4 | (1.31-1.50) |
| Sacral/coccyx fracture | 1.33 | (1.18-1.49) |
| Lumbar spine fracture | 1.3 | (1.20-1.41) |
| Lower extremity fracture | 1.21 | (1.15-1.28) |
| Shoulder/upper arm injury | 1.17 | (1.12-1.23) |
| Hip injury | 1.17 | (1.11-1.23) |
| Brain injury | 1.11 | (1.06-1.15) |
| Chest injury | 1.08 | (1.03-1.13) | 0.002 |
| Facial fracture | 0.9 | (0.86-0.95) | <0.001 |
| Skull fracture | 0.89 | (0.84-0.94) |
| ICU admission | 4.23 | (4.10-4.36) |
| Glasgow Coma Scale <15 | 2.92 | (2.84-3.00) |
| Systolic blood pressure (mmHg) | 1.83 | (1.69-1.98) |
| Transfer from outside hospital | 0.82 | (0.80-0.85) |
| Alcohol on board on amival | 0.71 | (0.66-0.76) |
| Cardiac arrest with cardiopulmonary resuscitation | 25.74 | (23.54-28.15) |
| Stroke | 3.62 | (3.22-4.08) |
| Severe sepsis | 3.16 | (2.87-3.48) |
| Acute lung injury/acute respiratory distress syndrome | 3.1 | (2.89-3.33) |
| Acute kidney injury | 2.66 | (2.49-2.85) |
| Myocardial infarction | 2.43 | (2.22-2.66) |
| Unplanned intubation | 2.32 | (2.13-2.52) |
| Pulmonary embolism | 2.13 | (1.86-2.44) |
| Pneumonia | 1.88 | (1.78-1.98) |
| Drug/alcohol withdrawal | 0.44 | (0.37-0.51) |
| 2008 | 0.94 | (0.87-1.01) | 0.09 |
| 2009 | 0.82 | (0.77-0.88) | <0.001 |
| 2010 | 0.81 | (0.75-0.86) |
| 2011 | 0.73 | (0.68-0.78) |
| 2012 | 0.69 | (0.64-0.74) |
| 2013 | 0.65 | (0.61-0.69) |
| 2014 | 0.67 | (0.63-0.72) |

# Appendix 4: Tables Including State Trauma Centre

| Table 4: Mortality in trauma centres compared to non-trauma centres | | | |
| --- | --- | --- | --- |
| Study | Trauma centre | Unadjusted Mortality  n (%) | Adjusted Comparison for Mortality  Summary statistic (95% CI) |
| Ahmed  2019  [(30)](https://www.zotero.org/google-docs/?w9T2aq) | ACS 1 & 2 | NR* | AOR 0.91 (0.80-1.04) |
| ACS 3 & 4 | Reference standard |
| Cook  2012  [(32)](https://www.zotero.org/google-docs/?jY44ka) | ACS 1 | 48 (6%) | AOR 0.71 (0.56-0.91) |
| ACS 2 | 69 (3.1%) | AOR 1.17 (0.90 - 1.51) |
| ACS 3 & 4 | 59 (1.1%) | AOR 1.22 (0.90 - 1.66) |
| Roubik  2017  [(33)](https://www.zotero.org/google-docs/?V4KReA) | ACS 1 & 2 | 22,382 (4.45%) | O:E 1.001 (1.001-1.002) |
| State 1 & 2 | 9,122 (4.3%) | O:E 0.998 (0.998-0.999) |
| ACS 3 & 4 | 1,342 (2.54%) | O:E 0.973 (0.971-0.975) |
| State 3 & 4 | 1,418 (3.11%) | O:E 1.043 (1.041-1.044) |
| *Author contacted but information not available | | | |
